# Supplementary material for: High-valent actinyl (AnO2; An = U, Np and Pu) complexation with TEtraQuinoline (TEQ) ligand – a DFT study
Source: Royal Society of Chemistry journal article supplement (doi:10.1039/d4cp01539h), 2024-01-01
Supplement: d4cp01539h1.pdf [file d4cp01539h1.pdf]

## Highvalent actinyl ( $\text{AnO}_2$ ; $\text{An}=\text{U}$ , $\text{Np}$ and $\text{Pu}$ ) complexation with TEtraQuinoline (TEQ) ligand – A DFT study

Abigail Jennifer G and Elumalai Varathan\*

Department of Chemistry, SRM Institute of Science and Technology, Kattankulathur 603  
203, Tamil Nadu, India.

Email: [varathan.elumalai85@gmail.com](mailto:varathan.elumalai85@gmail.com)

| Table number | Title                                                                                                                                                                                  | Page number |
|--------------|----------------------------------------------------------------------------------------------------------------------------------------------------------------------------------------|-------------|
| Table S1     | Geometric and electronic properties of actinyl cations in gas-phase computed at PBE/TZ2P level of theory                                                                               | 1           |
| Table S2     | Cavity size (in Å) of the TEQ after and before complexation with actinyl. The cavity size computed at PBE/TZ2P and PBE-D3(BJ)/TZ2P are provided on either side of “/”, respectively    | 2           |
| Table S3     | Torsion angle in TEQ and its complexes computed with PBE and PBE-D3(BJ) functionals in gas-phase                                                                                       | 2           |
| Table S4     | Computed bond lengths (in Å) of the actinyl-TEQ complexes in gas-phase at PBE-D3(BJ)/TZ2P level of theory                                                                              | 3           |
| Table S5     | Computed bond angles (in °) of the actinyl-TEQ complexes in gas-phase using PBE and PBE-D3(BJ) functionals                                                                             | 3           |
| Table S6     | O=An=O vibration frequencies ( $\text{cm}^{-1}$ ) in actinyl cations and their TEQ complexes calculated at PBE/TZ2P and PBE-D3(BJ)/TZ2P level of theories                              | 4           |
| Table S7     | Wiberg bond index calculated by the Natural Bond Orbital (NBO) analysis of actinyl-TEQ complexes in gas phase at PBE/TZ2P level of theory                                              | 4           |
| Table S8     | Mulliken charges on interacting atoms of actinyl-TEQ complexes computed at PBE/TZ2P level of theory                                                                                    | 5           |
| Table S9     | Spin density and orbital population of the actinyl's valence orbital on complexation with TEQ computed through NPA in gas-phase at Hybrid: PBE0-D3(BJ)/TZ2P/SR-ZORA                    | 5           |
| Table S10    | Thermodynamic parameters (in kcal/mol) for the formation of actinyl-TEQ complexes computed at PBE-D3(BJ)/TZ2P level of theory                                                          | 6           |
| Table S11    | Energy decomposition analysis (EDA) of actinyl-TEQ complexes. Actinyl versus TEQ, with energy contributions given in kcal/mol computed at PBE-D3(BJ)/TZ2P level of theory in gas phase | 6           |
| Table S12    | EDA of actinyl-TEQ complexes computed at Hybrid: PBE0-D3(BJ)/TZ2P level of theory in gas phase                                                                                         | 7           |
| Figure S1    | Optimized geometry of actinyl-TEQ complexes in gas-phase                                                                                                                               | 8           |

**Table S1.** Geometric and electronic properties of actinyl cations in gas-phase computed at PBE/TZ2P level of theory

|                                   | Bond length<br>(in Å) | NBO     | Bond angle<br>(in °) | Mulliken charge |                 | NPA charge |                 | Spin density |                 | An's valence orbital occupancy |       |       |       |
|-----------------------------------|-----------------------|---------|----------------------|-----------------|-----------------|------------|-----------------|--------------|-----------------|--------------------------------|-------|-------|-------|
|                                   | An=O1/2               | An=O1/2 | ∠O1=An=O2            | An              | O1/O2<br>(avg.) | An         | O1/O2<br>(avg.) | An           | O1/O2<br>(avg.) | 7s                             | 5f    | 6d    | 7p    |
| [UO <sub>2</sub> ] <sup>+</sup>   | 1.771                 | 1.022   | 180.0                | 2.524           | -0.262          | 2.034      | -0.517          | 1.088        | -0.044          | 0.050                          | 3.010 | 0.930 | -     |
| [NpO <sub>2</sub> ] <sup>+</sup>  | 1.765                 | 1.008   | 180.0                | 1.857           | -0.428          | 1.895      | -0.448          | 2.201        | -0.101          | 0.040                          | 4.190 | 0.890 | -     |
| [PuO <sub>2</sub> ] <sup>+</sup>  | 1.734                 | 0.998   | 180.0                | 1.804           | -0.402          | 1.719      | -0.360          | 3.315        | -0.158          | 0.040                          | 5.400 | 0.860 | -     |
| [UO <sub>2</sub> ] <sup>2+</sup>  | 1.716                 | 2.283   | 180.0                | 2.554           | -0.277          | 2.465      | -0.233          | 0.000        | 0.000           | 0.050                          | 2.520 | 1.020 | 0.010 |
| [NpO <sub>2</sub> ] <sup>2+</sup> | 1.713                 | 1.117   | 180.0                | 2.457           | -0.228          | 2.311      | -0.155          | 1.125        | -0.063          | 0.040                          | 2.730 | 0.960 | -     |
| [PuO <sub>2</sub> ] <sup>2+</sup> | 1.684                 | 1.098   | 180.0                | 2.388           | -0.194          | 2.128      | -0.064          | 2.249        | -0.125          | 0.040                          | 4.940 | 0.930 | 0.010 |
| [NpO <sub>2</sub> ] <sup>3+</sup> | 1.705                 | 1.253   | 149.5                | 2.982           | 0.009           | 2.739      | 0.131           | 0.000        | 0.000           | 0.010                          | 1.700 | 0.450 | -     |
| [PuO <sub>2</sub> ] <sup>3+</sup> | 1.715                 | 1.190   | 152.0                | 2.855           | 0.072           | 2.576      | 0.212           | 1.339        | -0.169          | 0.010                          | 1.650 | 0.410 | -     |

**Table S2.** Cavity size (in Å) of the TEQ after and before complexation with actinyl. The cavity size computed at PBE/TZ2P and PBE-D3(BJ)/TZ2P are provided on either side of “/”, respectively

|                                    | Actinyl-TEQ complexes |               | TEQ           |               |
|------------------------------------|-----------------------|---------------|---------------|---------------|
|                                    | N1-N3                 | N2-N4         | N1-N3         | N2-N4         |
| [UO <sub>2</sub> L] <sup>+</sup>   | 4.806 / 4.800         | 4.827 / 4.829 |               |               |
| [NpO <sub>2</sub> L] <sup>+</sup>  | 4.802 / 4.800         | 4.814 / 4.813 |               |               |
| [PuO <sub>2</sub> L] <sup>+</sup>  | 4.793 / 4.783         | 4.813 / 4.810 |               |               |
| [UO <sub>2</sub> L] <sup>2+</sup>  | 4.751 / 4.749         | 4.789 / 4.784 | 4.515 / 4.492 | 4.452 / 4.433 |
| [NpO <sub>2</sub> L] <sup>2+</sup> | 4.727 / 4.722         | 4.763 / 4.765 |               |               |
| [PuO <sub>2</sub> L] <sup>2+</sup> | 4.728 / 4.719         | 4.751 / 4.744 |               |               |
| [NpO <sub>2</sub> L] <sup>3+</sup> | 4.660 / 4.653         | 4.713 / 4.714 |               |               |
| [PuO <sub>2</sub> L] <sup>3+</sup> | 4.723 / 4.717         | 4.720 / 4.718 |               |               |

**Table S3.** Torsion angle (°) in TEQ and its complexes computed with PBE and PBE-D3(BJ) functionals in gas-phase

| Complex                            | N1-C1-C2-C3 | N2-C1-C2-C3 | N3-C1-C2-C3 | N4-C1-C2-C3 |
|------------------------------------|-------------|-------------|-------------|-------------|
| TEQ                                | 71.8 / 74.5 | 69.2 / 72.0 | 71.1 / 72.8 | 71.8 / 75.2 |
| [UO <sub>2</sub> L] <sup>+</sup>   | 77.1 / 82.1 | 52.1 / 52.5 | 77.2 / 78.2 | 55.2 / 55.4 |
| [NpO <sub>2</sub> L] <sup>+</sup>  | 71.5 / 71.6 | 60.0 / 60.0 | 62.2 / 62.3 | 59.0 / 59.1 |
| [PuO <sub>2</sub> L] <sup>+</sup>  | 61.3 / 61.5 | 62.5 / 62.4 | 61.0 / 61.2 | 66.1 / 66.3 |
| [UO <sub>2</sub> L] <sup>2+</sup>  | 65.1 / 64.7 | 56.7 / 57.6 | 62.9 / 62.8 | 61.4 / 61.8 |
| [NpO <sub>2</sub> L] <sup>2+</sup> | 64.0 / 65.1 | 57.5 / 56.5 | 62.4 / 63.3 | 61.5 / 61.0 |
| [PuO <sub>2</sub> L] <sup>2+</sup> | 64.8 / 65.0 | 56.9 / 56.1 | 63.0 / 62.6 | 59.3 / 61.6 |
| [NpO <sub>2</sub> L] <sup>3+</sup> | 62.0 / 63.0 | 57.9 / 56.6 | 60.0 / 60.6 | 62.0 / 61.8 |
| [PuO <sub>2</sub> L] <sup>3+</sup> | 59.8 / 60.5 | 60.0 / 59.8 | 58.3 / 58.1 | 61.6 / 62.0 |

**Table S4.** Computed bond lengths (in Å) of the actinyl-TEQ complexes in gas-phase at PBE-D3(BJ)/TZ2P level of theory

| Complex                            | An-N1 | An-N2 | An-N3 | An-N4 | An=O1 | An=O2 |
|------------------------------------|-------|-------|-------|-------|-------|-------|
| [UO <sub>2</sub> L] <sup>+</sup>   | 2.395 | 2.411 | 2.406 | 2.419 | 1.811 | 1.813 |
| [NpO <sub>2</sub> L] <sup>+</sup>  | 2.407 | 2.361 | 2.399 | 2.455 | 1.801 | 1.802 |
| [PuO <sub>2</sub> L] <sup>+</sup>  | 2.395 | 2.407 | 2.397 | 2.403 | 1.790 | 1.787 |
| [UO <sub>2</sub> L] <sup>2+</sup>  | 2.375 | 2.394 | 2.375 | 2.395 | 1.795 | 1.796 |
| [NpO <sub>2</sub> L] <sup>2+</sup> | 2.360 | 2.384 | 2.363 | 2.386 | 1.776 | 1.777 |
| [PuO <sub>2</sub> L] <sup>2+</sup> | 2.346 | 2.377 | 2.373 | 2.374 | 1.763 | 1.765 |
| [NpO <sub>2</sub> L] <sup>3+</sup> | 2.327 | 2.359 | 2.328 | 2.361 | 1.769 | 1.771 |
| [PuO <sub>2</sub> L] <sup>3+</sup> | 2.360 | 2.351 | 2.359 | 2.372 | 1.758 | 1.760 |

**Table S5.** Computed bond angles (in °) of the actinyl-TEQ complexes in gas-phase using PBE and PBE-D3(BJ) functionals

| Complex                            | Angles between adjacent N atoms (cis) |             |             |             | ∠O1=An=O2     | Angles between opposite N atoms (trans) |               |
|------------------------------------|---------------------------------------|-------------|-------------|-------------|---------------|-----------------------------------------|---------------|
|                                    | ∠N1-An-N2                             | ∠N2-An-N3   | ∠N3-An-N4   | ∠N4-An-N5   |               | ∠N1-An-N3                               | ∠N2-An-N4     |
| [UO <sub>2</sub> L] <sup>+</sup>   | 85.4 / 85.0                           | 93.8 / 95.9 | 85.0 / 85.3 | 95.9 / 93.9 | 179.5 / 179.3 | 177.2 / 178.0                           | 177.8 / 177.2 |
| [NpO <sub>2</sub> L] <sup>+</sup>  | 94.5 / 94.5                           | 90.5 / 90.5 | 89.2 / 89.2 | 86.0 / 86.1 | 179.1 / 179.2 | 174.6 / 174.6                           | 175.7 / 175.7 |
| [PuO <sub>2</sub> L] <sup>+</sup>  | 90.2 / 90.3                           | 89.7 / 89.8 | 89.6 / 89.4 | 90.5 / 90.5 | 179.9 / 179.9 | 173.1 / 173.1                           | 179.2 / 179.2 |
| [UO <sub>2</sub> L] <sup>2+</sup>  | 92.5 / 91.9                           | 88.0 / 88.6 | 90.8 / 90.6 | 88.8 / 89.1 | 179.8 / 179.8 | 178.1 / 177.8                           | 174.8 / 175.2 |
| [NpO <sub>2</sub> L] <sup>2+</sup> | 91.9 / 92.4                           | 88.4 / 88.1 | 90.8 / 91.0 | 89.1 / 88.7 | 179.8 / 179.9 | 178.5 / 178.0                           | 174.0 / 174.7 |
| [PuO <sub>2</sub> L] <sup>2+</sup> | 92.8 / 92.8                           | 88.8 / 87.3 | 91.0 / 90.6 | 87.5 / 89.5 | 179.7 / 179.8 | 177.7 / 178.1                           | 173.9 / 173.9 |
| [NpO <sub>2</sub> L] <sup>3+</sup> | 92.0 / 92.3                           | 88.5 / 88.2 | 90.5 / 90.7 | 89.3 / 89.0 | 179.7 / 179.8 | 177.3 / 177.0                           | 173.7 / 174.1 |
| [PuO <sub>2</sub> L] <sup>3+</sup> | 91.2 / 91.5                           | 90.0 / 89.9 | 89.9 / 89.6 | 89.2 / 89.3 | 179.6 / 179.6 | 176.6 / 176.5                           | 174.6 / 174.8 |

**Table S6.** O=An=O vibration frequencies ( $\text{cm}^{-1}$ ) in actinyl cations and their TEQ complexes calculated at PBE/TZ2P and PBE-D3(BJ)/TZ2P level of theories (given on the respective sides of /)

|                                   | Actinyl cations    |                     |                                    | Actinyl-TEQ complexes |                     |
|-----------------------------------|--------------------|---------------------|------------------------------------|-----------------------|---------------------|
|                                   | $\nu_{\text{sym}}$ | $\nu_{\text{asym}}$ |                                    | $\nu_{\text{sym}}$    | $\nu_{\text{asym}}$ |
| [UO <sub>2</sub> ] <sup>+</sup>   | 906.7 / 906.8      | 984.1 / 984.2       | [UO <sub>2</sub> L] <sup>+</sup>   | 800.7 / 803.0         | 894.0 / 895.9       |
| [NpO <sub>2</sub> ] <sup>+</sup>  | 888.1 / 917.3      | 980.2 / 998.7       | [NpO <sub>2</sub> L] <sup>+</sup>  | 780.6 / 782.3         | 881.7 / 883.5       |
| [PuO <sub>2</sub> ] <sup>+</sup>  | 891.8 / 892.1      | 989.6 / 989.9       | [PuO <sub>2</sub> L] <sup>+</sup>  | 772.3 / 773.7         | 877.7 / 879.3       |
| [UO <sub>2</sub> ] <sup>2+</sup>  | 998.8 / 998.1      | 1101.0 / 1100.3     | [UO <sub>2</sub> L] <sup>2+</sup>  | 836.0 / 837.2         | 926.6 / 927.6       |
| [NpO <sub>2</sub> ] <sup>2+</sup> | 966.5 / 967.2      | 1083.1 / 1083.9     | [NpO <sub>2</sub> L] <sup>2+</sup> | 828.7 / 830.0         | 928.4 / 929.7       |
| [PuO <sub>2</sub> ] <sup>2+</sup> | 977.4 / 888.4      | 1096.8 / 1008.1     | [PuO <sub>2</sub> L] <sup>2+</sup> | 809.5 / 812.4         | 926.3 / 928.5       |
| [NpO <sub>2</sub> ] <sup>3+</sup> | 931.0 / 930.6      | 1030.9 / 1030.5     | [NpO <sub>2</sub> L] <sup>3+</sup> | 840.1 / 841.8         | 949.1 / 950.9       |
| [PuO <sub>2</sub> ] <sup>3+</sup> | 862.8 / 865.9      | 969.5 / 973.1       | [PuO <sub>2</sub> L] <sup>3+</sup> | 821.1 / 821.5         | 938.5 / 939.0       |

**Table S7.** Wiberg bond index calculated by the Natural Bond Orbital (NBO) analysis of actinyl-TEQ complexes in gas phase at PBE/TZ2P level of theory

| Complex                            | An-N1 | An-N2 | An-N3 | An-N4 | An=O1 | An=O2 |
|------------------------------------|-------|-------|-------|-------|-------|-------|
| [UO <sub>2</sub> L] <sup>+</sup>   | 0.236 | 0.231 | 0.233 | 0.229 | 1.054 | 1.058 |
| [NpO <sub>2</sub> L] <sup>+</sup>  | 0.223 | 0.194 | 0.212 | 0.210 | 1.033 | 1.036 |
| [PuO <sub>2</sub> L] <sup>+</sup>  | 0.194 | 0.186 | 0.194 | 0.186 | 1.010 | 1.005 |
| [UO <sub>2</sub> L] <sup>2+</sup>  | 0.551 | 0.513 | 0.548 | 0.511 | 2.168 | 2.162 |
| [NpO <sub>2</sub> L] <sup>2+</sup> | 0.267 | 0.250 | 0.268 | 0.250 | 1.073 | 1.077 |
| [PuO <sub>2</sub> L] <sup>2+</sup> | 0.244 | 0.229 | 0.241 | 0.238 | 1.045 | 1.049 |
| [NpO <sub>2</sub> L] <sup>3+</sup> | 0.325 | 0.287 | 0.325 | 0.288 | 1.101 | 1.109 |
| [PuO <sub>2</sub> L] <sup>3+</sup> | 0.250 | 0.247 | 0.253 | 0.247 | 1.054 | 1.058 |

**Table S8.** Mulliken charges on interacting atoms of actinyl-TEQ complexes computed at PBE/TZ2P level of theory

| Complex                            | An    | N1     | N2     | N3     | N4     | O1     | O2     |
|------------------------------------|-------|--------|--------|--------|--------|--------|--------|
| [UO <sub>2</sub> L] <sup>+</sup>   | 1.828 | -0.488 | -0.515 | -0.483 | -0.518 | -0.585 | -0.580 |
| [NpO <sub>2</sub> L] <sup>+</sup>  | 1.743 | -0.472 | -0.488 | -0.496 | -0.491 | -0.584 | -0.580 |
| [PuO <sub>2</sub> L] <sup>+</sup>  | 1.786 | -0.493 | -0.481 | -0.490 | -0.484 | -0.576 | -0.581 |
| [UO <sub>2</sub> L] <sup>2+</sup>  | 1.961 | -0.534 | -0.518 | -0.521 | -0.521 | -0.546 | -0.541 |
| [NpO <sub>2</sub> L] <sup>2+</sup> | 1.887 | -0.515 | -0.503 | -0.506 | -0.505 | -0.530 | -0.525 |
| [PuO <sub>2</sub> L] <sup>2+</sup> | 1.939 | -0.504 | -0.507 | -0.503 | -0.503 | -0.521 | -0.513 |
| [NpO <sub>2</sub> L] <sup>3+</sup> | 1.953 | -0.523 | -0.503 | -0.511 | -0.505 | -0.496 | -0.485 |
| [PuO <sub>2</sub> L] <sup>3+</sup> | 1.970 | -0.507 | -0.509 | -0.504 | -0.502 | -0.505 | -0.493 |

**Table S9.** Spin density and orbital population of the actinyl's valence orbital on complexation with TEQ computed through NPA in gas-phase at Hybrid: PBE0-D3(BJ)/TZ2P/SR-ZORA

| Complex                            | NPA Spin density |             |              | An's valence orbital occupancy in complex |      |      |      |
|------------------------------------|------------------|-------------|--------------|-------------------------------------------|------|------|------|
|                                    | An               | Assigned OS | O1/O2 (avg.) | 7s                                        | 5f   | 6d   | 7p   |
| [UO <sub>2</sub> L] <sup>+</sup>   | 0.712            | V           | -0.032       | 0.16                                      | 2.89 | 1.50 | 0.02 |
| [NpO <sub>2</sub> L] <sup>+</sup>  | 2.122            | V           | -0.103       | 0.15                                      | 4.21 | 1.39 | 0.02 |
| [PuO <sub>2</sub> L] <sup>+</sup>  | 3.284            | V           | -0.177       | 0.15                                      | 5.35 | 1.34 | 0.02 |
| [UO <sub>2</sub> L] <sup>2+</sup>  | 0.000            | VI          | 0.000        | 0.17                                      | 2.65 | 1.58 | 0.02 |
| [NpO <sub>2</sub> L] <sup>2+</sup> | 1.136            | VI          | -0.072       | 0.18                                      | 3.94 | 1.54 | 0.02 |
| [PuO <sub>2</sub> L] <sup>2+</sup> | 2.468            | VI          | -0.163       | 0.17                                      | 5.17 | 1.50 | 0.02 |
| [NpO <sub>2</sub> L] <sup>3+</sup> | 0.000            | VII         | 0.000        | 0.18                                      | 3.98 | 1.62 | 0.02 |
| [PuO <sub>2</sub> L] <sup>3+</sup> | 2.338            | VII → VI    | -0.158       | 0.18                                      | 4.11 | 1.50 | 0.02 |

**Table S10.** Thermodynamic parameters (in kcal/mol) for the formation of actinyl-TEQ complexes computed at PBE-D3(BJ)/TZ2P level of theory

| Complex                            | Gas phase  |            |            |              | DCE medium |            |            |              |
|------------------------------------|------------|------------|------------|--------------|------------|------------|------------|--------------|
|                                    | $\Delta G$ | $\Delta H$ | $\Delta E$ | $-T\Delta S$ | $\Delta G$ | $\Delta H$ | $\Delta E$ | $-T\Delta S$ |
| [UO <sub>2</sub> L] <sup>+</sup>   | -116.21    | -129.85    | -130.46    | 13.64        | -36.64     | -47.32     | -48.57     | 10.68        |
| [NpO <sub>2</sub> L] <sup>+</sup>  | -115.17    | -128.27    | -129.15    | 13.10        | -45.86     | -51.26     | -64.79     | 11.34        |
| [PuO <sub>2</sub> L] <sup>+</sup>  | -108.97    | -120.35    | -122.15    | 11.38        | -34.34     | -47.05     | -48.33     | 12.71        |
| [UO <sub>2</sub> L] <sup>2+</sup>  | -288.06    | -302.66    | -304.61    | 14.60        | -74.55     | -88.39     | -90.18     | 13.85        |
| [NpO <sub>2</sub> L] <sup>2+</sup> | -291.47    | -306.24    | -308.27    | 14.77        | -84.31     | -98.39     | -100.24    | 14.08        |
| [PuO <sub>2</sub> L] <sup>2+</sup> | -306.19    | -319.80    | -321.76    | 13.61        | -102.00    | -115.01    | -116.58    | 13.02        |
| [NpO <sub>2</sub> L] <sup>3+</sup> | -624.24    | -637.81    | -640.64    | 13.56        | -198.24    | -214.44    | -215.92    | 16.20        |
| [PuO <sub>2</sub> L] <sup>3+</sup> | -636.88    | -651.36    | -653.4     | 14.48        | -218.09    | -230.29    | -232.75    | 12.20        |

**Table S11.** Energy decomposition analysis (EDA) of actinyl-TEQ complexes. Actinyl versus TEQ, with energy contributions given in kcal/mol computed at PBE-D3(BJ)/TZ2P level of theory in gas phase

| Fragments                              | $\Delta E_{\text{el-stat}}$ | $\Delta E_{\text{orb}}$ | $\Delta E_{\text{steric}}$ | $\Delta E_{\text{Pauli}}$ | $\Delta E_{\text{int}}$ | $\Delta E_{\text{disp}}$ |
|----------------------------------------|-----------------------------|-------------------------|----------------------------|---------------------------|-------------------------|--------------------------|
| [UO <sub>2</sub> ] <sup>+</sup> vs L   | -221.68                     | -188.84                 | 54.87                      | 276.55                    | -145.33                 | -11.35                   |
| [NpO <sub>2</sub> ] <sup>+</sup> vs L  | -222.32                     | -169.94                 | 41.14                      | 263.47                    | -139.61                 | -10.82                   |
| [PuO <sub>2</sub> ] <sup>+</sup> vs L  | -216.28                     | -159.95                 | 33.75                      | 250.03                    | -138.28                 | -12.08                   |
| [UO <sub>2</sub> ] <sup>2+</sup> vs L  | -288.61                     | -332.27                 | 8.51                       | 297.12                    | -334.99                 | -11.24                   |
| [NpO <sub>2</sub> ] <sup>2+</sup> vs L | -288.49                     | -324.91                 | 5.95                       | 294.44                    | -329.72                 | -10.76                   |
| [PuO <sub>2</sub> ] <sup>2+</sup> vs L | -284.01                     | -317.85                 | -0.46                      | 283.55                    | -330.36                 | -12.05                   |
| [NpO <sub>2</sub> ] <sup>3+</sup> vs L | -359.86                     | -633.44                 | -32.57                     | 327.29                    | -676.73                 | -10.72                   |
| [PuO <sub>2</sub> ] <sup>3+</sup> vs L | -343.25                     | -625.34                 | -47.11                     | 296.14                    | -684.46                 | -12.01                   |

**Table S12.** EDA of actinyl-TEQ complexes (in kcal/mol) computed at PBE0-D3(BJ)/TZ2P level of theory in gas phase

| <b>Fragments</b>                       | $\Delta E_{\text{el-stat}}$ | $\Delta E_{\text{orb}}$ | $\Delta E_{\text{steric}}$ | $\Delta E_{\text{Pauli}}$ | $\Delta E_{\text{int}}$ | $\Delta E_{\text{disp}}$ |
|----------------------------------------|-----------------------------|-------------------------|----------------------------|---------------------------|-------------------------|--------------------------|
| [UO <sub>2</sub> ] <sup>+</sup> vs L   | -218.20                     | -172.44                 | 42.23                      | 260.44                    | -142.47                 | -12.27                   |
| [NpO <sub>2</sub> ] <sup>+</sup> vs L  | -220.15                     | -164.89                 | 28.37                      | 248.52                    | -147.31                 | -11.69                   |
| [PuO <sub>2</sub> ] <sup>+</sup> vs L  | -214.48                     | -148.72                 | 22.70                      | 237.18                    | -139.49                 | -13.47                   |
| [UO <sub>2</sub> ] <sup>2+</sup> vs L  | -289.67                     | -321.59                 | -5.07                      | 284.60                    | -337.81                 | -12.11                   |
| [NpO <sub>2</sub> ] <sup>2+</sup> vs L | -289.63                     | -319.82                 | -9.67                      | 279.97                    | -341.10                 | -11.62                   |
| [PuO <sub>2</sub> ] <sup>2+</sup> vs L | -285.34                     | -318.68                 | -14.79                     | 270.55                    | -346.54                 | -13.07                   |
| [NpO <sub>2</sub> ] <sup>3+</sup> vs L | -362.93                     | -595.26                 | -48.30                     | 314.62                    | -654.26                 | -11.57                   |
| [PuO <sub>2</sub> ] <sup>3+</sup> vs L | -343.88                     | -653.18                 | -53.82                     | 290.06                    | -720.02                 | -13.01                   |



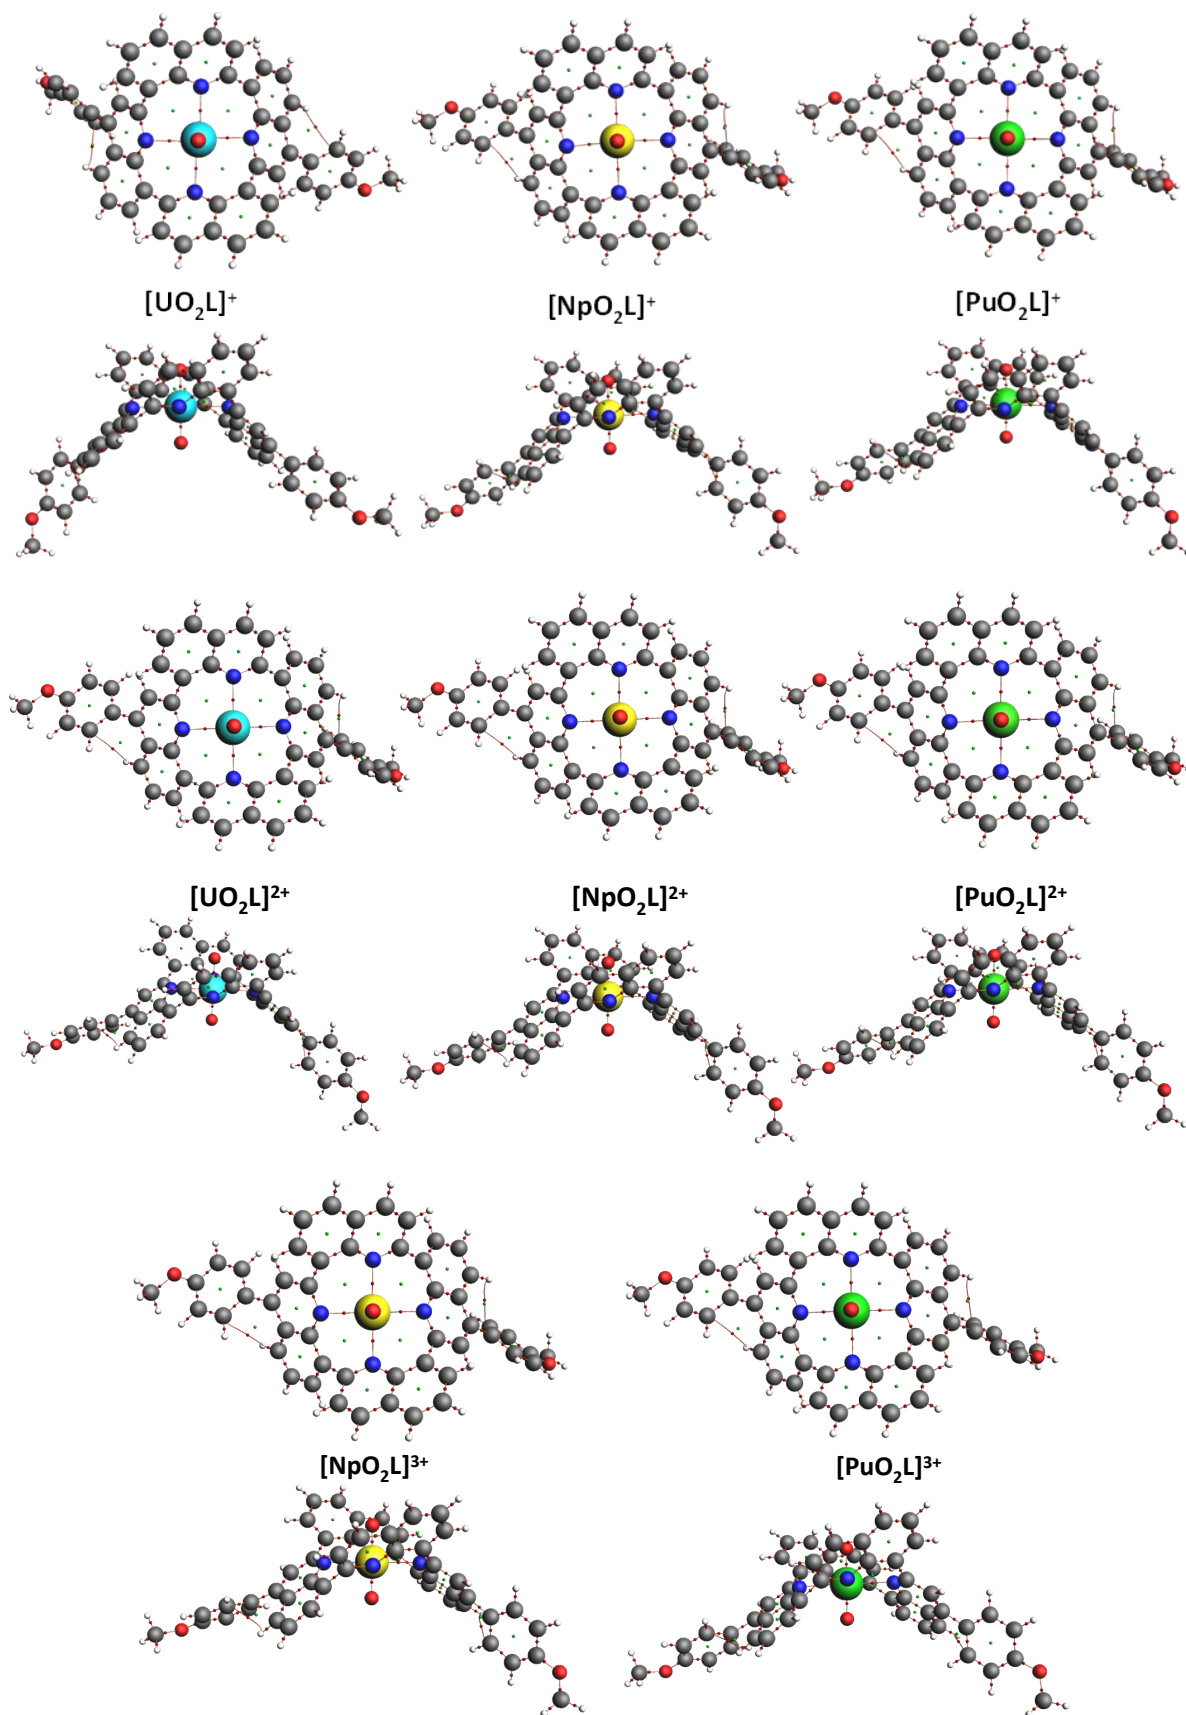

**Figure S1.** QTAIM topology of the actinyl-TEQ complexes representing the bond paths and electron densities ( $\rho$ ) at the BCPs.
